# Supplementary material for: Who am I? A linguistic analysis of speech pathology students’ professional identity formation as reflected in their ePortfolios
Source: Research Square preprint supplement (doi:10.21203/rs.3.rs-8748458/v1), 2026-02-24
Supplement: Supplementary file 1 [file 8e608e897c1966cb97015021.docx]

Supplementary file

Who am I? A linguistic analysis of speech pathology students’ professional identity formation formation as reflected in their ePortfolios

Abigail Lewisab*, Professor Elizabeth Armstronga

aUniversity Department of Rural Health South West, Edith Cowan University, Bunbury, Australia bSchool of Education, Curtin University, Perth, Australia;

*Corresponding author

E-mail: [Abigail.lewis@ecu.edu.au](mailto:Abigail.lewis@ecu.edu.au)

Advances in Health Sciences Education (AHSE) Journal

Contents

[Who am I? page instructions 2](#_Toc207620039)

[Text Characteristics 3](#_Toc207620040)

[Transitivity 4](#_Toc207620041)

[Identical lexical items for processes in Y1 and Y4 texts 4](#_Toc207620042)

[Most common lexical items identified in Y1 and Y4 texts 4](#_Toc207620043)

[Appraisal: Modality 5](#_Toc207620044)

[All examples of modality in the texts 5](#_Toc207620045)

[Modal word type frequency and % for Y1 and Y4. 7](#_Toc207620046)

[Type and degree of modality across Y1 and Y4 texts 7](#_Toc207620047)

[Frequency of modality within clauses for Y1 and Y4 texts 8](#_Toc207620048)

[Appraisal: Attitude 9](#_Toc207620049)

[Examples of attitude types with polarity 9](#_Toc207620050)

[Frequency of attitude within clauses for Y1 and Y4 texts 11](#_Toc207620051)

[Polarity of attitude types 11](#_Toc207620052)

[Genre 12](#_Toc207620053)

[Example of a summary of a text for participant #2 12](#_Toc207620054)

[Summary of overall genre analysis 13](#_Toc207620055)

[Stages and order of stages in each text 14](#_Toc207620056)

[Stages in Y1 14](#_Toc207620057)

[Stages in Y4 17](#_Toc207620058)

[Scaffolding reflection for professional identity formation 20](#_Toc207620059)

[Who am I reflection scaffolding for Y1 and Y2 20](#_Toc207620060)

[Who am I reflection scaffolding for Y3 and Y4 22](#_Toc207620061)

# Who am I? page instructions

The following information is part of the ‘Becoming a Speechie’ booklet available to all students in 2018. This booklet contained information about competencies, employability, wellbeing and detailed information about all the sections of the ePortfolio. This is the section about the “Who am I?” page:

**Who am I?**

This page of your ePortfolio is an introduction to who you are as a person and your philosophy as a speech pathologist. As you move through your course this page becomes part of your introduction of yourself as a speech pathologist and part of your professional presentation of your skills and abilities you can use for future employers.

***Why develop a philosophy of being a speech pathologist?***

Your philosophy is a critical rationale – a set of values, beliefs and convictions about how and why you are (becoming) a speech pathologist. Here are some reasons having a philosophy will help you (adapted from Brookfield, 1990):

- It is a plan of development or ‘organising vision’ – what you think is a good speech pathologist so you know what you are aiming for in your studies.
- It will help you when you can’t remember why you’re doing this course!
- It will help you when you get out into a chaotic working environment.
- It will help you with the pressures you are under as a student and when you are qualified.

***How do I develop a philosophy?***

You will complete this activity in a lecture. You will choose some photos to support your thinking. Then you will be given some questions to help your reflection:

- Why are you becoming a speech pathologist?
- What has led you to becoming a speech pathologist?
- Why is becoming a speech pathologist important to you?
- What kind of speech pathologist do you want to be and why?

You can be as creative as you like in completing your philosophy: a mind map, a drawing, collage, poem, story or text. You will complete this activity each year and reflect on how your philosophy is changing as you develop as a speech pathologist. Keep all your philosophies over the course on this page and see how much you change over the course!

# Text Characteristics

The text characteristics of word count, sentence count and sentence length were calculated using the text characteristics feature of Word. Y1 texts were collated and analysed separately to the collated Y4 texts. Means for each cohort were calculated.

Text characteristics

| Characteristic | Y1 (*n* =10) | Y4 (*n* =10) |
| --- | --- | --- |
| Total words across all texts | 3927 | 3868 |
| Average number of words (range) | 392.7 (154-584) | 386.8 (128-501) |
| Total sentences (average) | 197 (19.7) | 155 (15.5) |
| Average number of words per sentence | 20 | 24.8 |

# Transitivity

## Identical lexical items for processes in Y1 and Y4 texts

Average identical between Y1 and Y4 cohorts: 71%

|  | Material | Relational | Mental | Verbal | Total  (average) |
| --- | --- | --- | --- | --- | --- |
| Frequency of Y1 process | 247 | 194 | 184 | 15 | **640** |
| Frequency of Y1 lexical items identical with Y4 | 178 | 186 | 135 | 7 | **505** |
| % of Y1 lexical items identical with Y4 | 72 | 96 | 73 | 47 | **(72%)** |
| Frequency of Y4 process | 261 | 166 | 159 | 25 | **611** |
| Frequency of Y4 lexical items identical with Y1 | 187 | 159 | 113 | 10 | **470** |
| % of Y4 lexical items identical with Y1 | 72 | 94 | 71 | 40 | **(69%)** |

## Most common lexical items identified in Y1 and Y4 texts

Lexical items with 10 or more instances in one or both cohorts highlighted.

| **Process** | **Y1** | **Y4** | **Process** | **Y1** | **Y4** | **Process** | **Y1** | **Y4** |
| --- | --- | --- | --- | --- | --- | --- | --- | --- |
| **Material processes** | | | **Mental processes** | | | **Relational processes** | | |
| work | 24 | 20 | want | 17 | 12 | be | 139 | 124 |
| do | 17 | 9 | know | 15 | 11 | have | 33 | 28 |
| help | 17 | 16 | love | 13 | 5 | become | 5 | 2 |
| take | 14 | 8 | learn | 9 | 14 | grew | 3 | 4 |
| study | 11 | 5 | see | 9 | 3 | **Verbal processes** | | |
| give | 7 | 5 | decide | 7 | 1 | communicate | 3 | 4 |
| go | 7 | 3 | look | 7 | 0 | express | 0 | 3 |
| make | 7 | 15 | need | 7 | 1 | sing | 2 | 0 |
| choose | 5 | 3 | realise | 7 | 6 | talk | 2 | 1 |
| come | 5 | 7 | enjoy | 6 | 4 | advocate | 0 | 5 |
| find | 5 | 3 | think | 6 | 13 | speak | 1 | 2 |
| get | 5 | 5 | feel | 5 | 7 |
| live | 5 | 4 | understand | 5 | 7 |
| travel | 5 | 0 | believe | 4 | 11 |
| achieve | 4 | 0 | drawn to | 4 | 1 |
| graduate | 4 | 1 | focus | 4 | 0 |
| improve | 4 | 10 | hope | 4 | 4 |
| pursue | 4 | 0 | interest | 4 | 1 |
| start | 4 | 4 | like | 4 | 0 |
| teach | 4 | 2 | wait | 4 | 0 |
| complete | 3 | 4 | consider | 0 | 7 |
| develop | 1 | 15 | appreciate | 0 | 4 |
| continue | 2 | 7 |
| provide | 2 | 7 |
| apply | 2 | 4 |
| change | 1 | 4 |
| try | 1 | 4 |

# Appraisal: Modality

## All examples of modality in the texts

| Type | degree | Word type | Example lexical items from texts | Examples with context from texts |
| --- | --- | --- | --- | --- |
| Probability | high (certainty) | modal verb  modal adverb  modal noun  verb | cannot/can’t, will (never), would,  absolutely, always, certainly not, nor ever, definitely, drastically, just, never (really/fully), particularly, really (only), truly,  no idea  (not) know | I always ***knew*** I ***would*** pursue a career… #2 Y1  It was ***definitely*** an eye-opening experience… #2 Y1  …this ***would*** ***definitely*** be a massive career goal… #2 Y1  I… have ***absolutely*** loved working… #105 Y4  This encompasses my drive to ***always*** focus on… #99 Y4  …its importance ***cannot*** be overstated… #7 Y4  I ***know*** I have a lot to learn, but I ***know***… #110 Y4  I ***never*** expected how much I ***would*** grow… #6 Y4  I ***really*** have developed… #6 Y4  The degree ***really*** provides… #8 Y4  … that I ***will*** be forever grateful for… #8 Y4  …I am ***sure*** this ***will*** be reflected…#108 Y4 |
| Medium (probability) | modal verb  modal adverb  verb | am able to (can), can, could, couldn’t, shall  almost, probably  believe, feel (think), not sure, think, to enable | It was ***almost*** as if… #2 Y1  I ***think*** this… #2 Y1  I want ***to be able*** to… #41 Y4  I ***am able to*** improve…#105 Y4  I ***believe*** that I am… #108 Y4  This career choice ***can*** change lives… #41 Y4  A [SP] ***can*** have a significant impact… #7 Y4  … challenges that ***can*** be overcome. #41 Y4  This ***could*** be helping an individual… #41 Y4  ***Probably***, the most difficult… #8 Y4  My role… ***shall*** be… #7 Y4 |
| Low (possibility) | modal verb  modal adverb  verb | may, might (not)  merely, possibly/possible  hope, seem | … I am ***possibly*** interested in… #72 Y1  I ***hope*** to remain mindful of the impact… #7 Y4  … I ***hope*** to bring to my future career. #110 Y4  I ***may*** work with the two things… #6 Y4  …that life ***may*** throw at you. #41 Y4  …I ***might*** face… #108 Y4  The ones that make it ***possible*** to survive… #41 Y4  A clinician who orchestrates change where ***possible***…Y4#7  [SP] ***seemed*** like the perfect combination… #99 Y4 |
| Usuality | High (always) | modal adverb | always, constantly, finally, very | …I have ***always*** struggled… #72 Y1  …and who ***constantly*** amazes me. #72 Y1  I was ***always*** interested in studying [SP]… #8 Y4  I rely ***so much***…#99 Y4 |
| Medium (usually) | - | - | - |
| Low (sometimes) | modal adverb | only (when/just)  not just | …to ***not just*** improve function… #41 Y4  It ***only*** takes one bump … #8 Y4 |
| inclination | High (determined) | Verb | want  need | …what I ***needed*** to do ***to pursue*** it #2 Y1  I ***always wanted*** [to] help people… #75 Y1  I ***want*** to be the very best person possible… #108 Y4 |
| Medium (keen) | Adverb | endeavour  just | …continue ***to endeavour***… to learn… #111 Y4  …providing…someone who will ***just*** listen… #6 Y4 |
| Low (willing) | Verb | willing to  wish | My supervisors…were ***willing*** to share… #100 Y4  I ***wish*** to follow… #7 Y4 |
| obligation | High (required) | verb  adverb  noun | just how vital, meant  must, required, had to, made me  essential, imperative | …what I was ***meant*** to do in life. #15 Y1  I ***had*** to do this job #8Y4  …it is ***imperative*** to view the situation... #100 Y4  …I realised ***just how vital*** communication is… #99 Y4  It has also ***made me*** realise… #105 Y4  The struggle one ***must*** feel… #99 Y4  …across all the range of practise ***required.*** #99 Y4 |
| Medium (supposed) | - | - | (none) |
| Low (allowed) | Verb | allowed to | That may ***allow*** me to … ##8 Y4 |

## Modal word type frequency and % for Y1 and Y4.

| Modal type | Y1 frequency (*n* = 10) | % of all modals | Y4 frequency (*n* = 10) | % of all modals |
| --- | --- | --- | --- | --- |
| Verb (main) | 62 | 44.93 | 66 | 44.59 |
| Modal verb | 39 | 28.26 | 49 | 33.11 |
| Modal adverb | 37 | 26.81 | 28 | 18.92 |
| Modal noun | 0 | 0 | 5 | 3.38 |
| Total | **138** | **100** | **148** | **100** |

## Type and degree of modality across Y1 and Y4 texts

| Type of modality | Y1 frequency (%)  *n* = 138 | Y1 % of texts with type  *n* = 10 | Y4 frequency (%)  *n* = 148 | Y4 % of texts with type  *n* = 10 |
| --- | --- | --- | --- | --- |
| Probability: high | 50 (36) | 90 | 53 (36) | 100 |
| medium | 36 (26) | 90 | 45 (31) | 90 |
| low | 11 (8) | 60 | 15 (10) | 90 |
| Usuality: high | 17 (12) | 70 | 4 (3) | 20 |
| medium | 0 | 0 | 0 | 0 |
| low | 1 (1) | 10 | 3 (2) | 20 |
| Inclination: high | 20 (15) | 80 | 12 (8) | 40 |
| medium | 0 | 0 | 2 (1) | 20 |
| low | 0 | 0 | 5 (3) | 40 |
| Obligation: high | 3 (2) | 20 | 7 (5) | 40 |
| medium | 0 | 0 | 0 | 0 |
| low | 0 | 0 | 2 (1) | 20 |
| Total | **138 (100)** | **-** | **148 (100)** | **-** |

## Frequency of modality within clauses for Y1 and Y4 texts

| # | Total clauses | Frequency of modality | % modality |
| --- | --- | --- | --- |
| Y1 | | | |
| 2 | 73 | 34 | 46.57 |
| 15 | 93 | 27 | 29.03 |
| 22 | 79 | 18 | 22.78 |
| 27 | 45 | 7 | 15.56 |
| 46 | 59 | 7 | 11.86 |
| 55 | 81 | 12 | 14.81 |
| 56 | 34 | 6 | 17.65 |
| 66 | 31 | 4 | 12.90 |
| 72 | 83 | 12 | 14.46 |
| 75 | 64 | 12 | 18.75 |
| Average | **64.2** | **13.9** | **20.44** |
| Y4 | | | |
| 6 | 71 | 14 | 19.72 |
| 7 | 54 | 12 | 22.22 |
| 8 | 91 | 32 | 35.16 |
| 41 | 72 | 23 | 31.94 |
| 99 | 75 | 14 | 18.67 |
| 100 | 46 | 13 | 28.26 |
| 105 | 43 | 7 | 16.28 |
| 108 | 58 | 13 | 22.41 |
| 110 | 47 | 14 | 29.79 |
| 111 | 54 | 8 | 14.81 |
| Average | **61.1** | **15** | **23.93** |

# Appraisal: Attitude

## Examples of attitude types with polarity

| Attitude polarity | Examples Y1 | Examples Y4 |
| --- | --- | --- |
| Positive affect | I was ***always interested*** in… #15  I ***cannot wait***… #27  …to give a child the ***confidence***… #56  I ***enjoyed*** it… #2  …I am ***excited*** to learn about… #22  I’ve had a ***fascination and inclination*** toward… #55  I have ***goals and aspirations*** for my future… #15  …I ***love*** to help people… #66  I am ***loving*** the course… #46  It takes a ***special person*** to… #15  I have ***such a passion*** for …#2 | …helped me develop my ***confidence*** in expressing myself… #99  … how ***excited*** I am… how ***proud*** I am… #8  …always focus on helping [to] ***inspire*** a client… #99  …the way they [clients] ***inspire*** me. #99  … I would come ***to love*** the profession… #6 |
| Affect Negative | …but I ***didn’t love*** it. #2  …I am ***insanely busy***… #27 Y  …I have always ***struggled***… #72  …I ***wasn’t passionate*** about it… #22  …I ***wasn’t fulfilled***… #55 | [SP is]… being ***challenged to the brink***… #6  … how much I would be ***challenged…*** #6  …I am ***saddened*** by… #99  …leaves me feeling more ***undecided*** on the path… #7 |
| Appreciation positive | …the ***fascinating area*** of [SP]. #75  …***the opportunities*** I am given here… #2  …made me realise ***my purpose*** in life… #2  …I have had some ***amazing experiences***. #27  I ***wanted*** to study [SP]… #15 | …the degree really provides an ***amazing platform*** in terms of... #8  the ***biggest bonus*** I have taken from this degree… #8  Communication is ***at the heart*** of all human relationships… #7  [SP] is ***so much more*** than just words… #6  …I find working ***uplifting and rewarding*** #7  I never expected how much I ***would grow…*** #6 |
| Appreciation Negative | taking on an ***intense*** 4 year course… #75 | the most ***difficult aspect*** of this degree has been… #8  I will certainly not ***miss the many late nights*** #8 |
| Judgement positive | I began ***doing really well*** in my science subjects… #15  I have a ***lot of personality traits***… #15  …there are ***many opportunities*** that await… #46  … improving ***the quality of their lives***… #55  I have a ***smart and courageous***… daughter… #72 | I believe I have ***developed my competencies*** in every area… #6  Through this course I have ***developed resilience, maturity***… #6  [SP is]… someone who ***understands*** and someone who is ***committed***. #6  I believe ***everyone deserves the right*** to communicate…#6 Y4  each new experience…***adds to my skill and knowledge.*** base #7  …helping each child move towards ***fulfilling their potential.*** #7  …this career choice can… give a ***voice to the voiceless…*** #41  My supervisors were ***great mentors***… #100  …I have the ***drive and willingness***… #105 |
| Judgement Negative | …there ***hasn’t been enough information*** #2  …some clients ***may take a long time*** to understand… #15  …it was a ***long road*** to get there… #22 | …the role of [SP] is, I feel, ***commonly misunderstood***.. #7  …[SP] is not for the ***faint hearted*** #8  …my areas of improvement are… #99  …the general public’s ***lack of awareness*** … #99  I know I ***have a lot to learn***… #110 |

## Frequency of attitude within clauses for Y1 and Y4 texts

| # | Total clauses | Frequency of attitude | % appraisal |
| --- | --- | --- | --- |
| Y1 | | | |
| 2 | 73 | 21 | 28.77 |
| 15 | 93 | 32 | 34.41 |
| 22 | 79 | 27 | 34.18 |
| 27 | 45 | 22 | 48.89 |
| 46 | 59 | 16 | 27.11 |
| 55 | 81 | 23 | 28.40 |
| 56 | 34 | 10 | 29.41 |
| 66 | 31 | 10 | 32.26 |
| 72 | 83 | 26 | 31.33 |
| 75 | 64 | 20 | 31.25 |
| Average | **64.2** | **20.70** | **32.60** |
| Y4 | | | |
| 6 | 71 | 35 | 49.30 |
| 7 | 54 | 22 | 40.74 |
| 8 | 91 | 40 | 43.96 |
| 41 | 72 | 26 | 36.11 |
| 99 | 75 | 31 | 41.33 |
| 100 | 46 | 16 | 34.78 |
| 105 | 43 | 13 | 30.23 |
| 108 | 58 | 26 | 44.83 |
| 110 | 47 | 18 | 38.30 |
| 111 | 54 | 22 | 40.74 |
| Average | **61.1** | **24.90** | **40.03** |

## Polarity of attitude types

| Attitude type | Y1  (*n* = 207) | % of type | Y4*  (*n* = 248) | % of type |
| --- | --- | --- | --- | --- |
| Positive affect | 93 | 95 | 58 | 78 |
| appreciation | 27 | 93 | 30 | 81 |
| judgement | 68 | 85 | 120 | 87 |
| Total positive | **188** | **91** | **208** | **84** |
| Negative affect | 5 | 5 | 16 | 22 |
| appreciation | 2 | 7 | 7 | 19 |
| judgement | 12 | 15 | 16 | 12 |
| Total negative | **19** | **9** | **39** | **16** |

* one neutral statement, a judgment by Y4, has been omitted

# Genre

## Example of a summary of a text for participant #2

| Code | Year 2018 | Age | Gender | Study type | Student type | Primary language | SES | Regionality | NESB | Country of birth | Disability | First In family |
| --- | --- | --- | --- | --- | --- | --- | --- | --- | --- | --- | --- | --- |
| 2 | Y1 | 20 | Female | Full-time | Domestic | English | medium | urban | no | Australia | unknown | no |

| Word count | 434 |
| --- | --- |
| Start | Greeting, Hi but also has heading who am I an introduction |
| What stands out? | What stands out is the enthusiasm, strongly positive wording, exaggerated almost – extremely rewarding, huge interest, massive career goal, didn’t LOVE it, |
| Describe story, match to reflection questions given to students | Describes firstly her journey from school through nursing and travel to speech pathology.  Strongly positioning that SP is the right career for her, her purpose, ‘drawn to it’, fits who she is as a person, she can picture herself in it, will be a rewarding career.  First two paragraphs cover Q2, then Q1/3 then Q4 2 paragraphs.  Majority of sentences commence ‘I’. Maybe even justifying herself to me to be a SP? |
| Use of multi-modal features | Uses own banner with heading: Who Am I? An Introduction. Text light grey, one use of capitals LOVE it, followed by quote re success/failure – perhaps to reinforce her decision to switch from nursing to SP as not a ‘failure’ but the ‘courage to continue’?  Perhaps her grades weren’t high enough originally to do SP? Then a funny picture: ST is appealing with banana – to highlight she has found resources related to career online? Sense of humour? |
| Identity language | I am age, SP student – the identity currently given.  Identity language: interest in, purpose, drawn towards, passion for helping, interest in, important life skill, huge interest in, unquestionably interesting, working with, help children, rewarding, interested in, pictured myself as, career goal, make a difference, rewarding job helping people |
| What will be interesting to study further? | Transitivity will be interesting, participants, process.  Adjectives also as part of modality as she uses many!  Strongly positive mood! |
| Demographics link | The strong enthusiasm matches with being young, almost straight out of school. |

## Summary of overall genre analysis

| **Label** | **Stages summary:** | **Rationale** | **Order** | **Optional (yes or no)** | **Recursive (yes or no)** | **Relevant variables** |
| --- | --- | --- | --- | --- | --- | --- |
| My identity | Current personal/other identities Not previous career or studies | This is who I am right now and the life that has shaped me. I’m stating the facets of my identity in terms of those that stand out to me right now (as maybe I’m not quite sure about my identity as a SP). | i | Y | N | Relational processes  Present and past tense |
| Finding SP | Specific experiences; general experiences; and/or research exploring what to study, including other careers considered | This is what led me to SP, how I found out about SP | ii | Y | Y | Material and mental processes  Past tense |
| Other careers | Previous job, career or study (partial/complete) that has shaped or that didn’t fit me. | I have engaged in other work, had a previous career or started/completed a previous course but they didn’t suit me like I know SP will. Or they have shaped me but time for a change. | iii | Y | Y | Relational or material processes  Past tense |
| SP is my purpose | Seeing/positioning SP (or an aspect of it) as my purpose, what I was meant to do | SP is meant for me, my purpose, I know it is what I am to do, my aspiration, my calling | iv+ | Y | N | Relational processes |
| I fit SP | Describing own personality traits and/or interests important for or linked with SP | Justification of my choice – this is how I fit the SP role/identity. I am like SP in this way. | any | Y | Y | Relational processes |
| My SP future | This is the SP role and how I see myself in that SP role in the future or I’m looking forward to my future/learning more about becoming SP | I see myself in the role, I want to be/do this | ii+ | N | Y | Material processes  Future tense |
| My SP journey | What I have learned, how I have changed, over years of the program | This is how far I have come | any | Y | Y | Relational processes  Past tense |
| Advocacy for SP | This is how I understand the profession and how valuable it is now, how little understood, how important to advocate | This is the importance of SP, how little understood it is, I’m standing for SP | any | Y | Y | Obligation modality |
| The future of SP | This is how I see the profession is going to change in the future | Looking to the future of the profession itself. | iv | Y | N | Future tense |

## Stages and order of stages in each text

### Stages in Y1

| **Student** | **Stages summary** | **Order of stages** | | | | | | | | |
| --- | --- | --- | --- | --- | --- | --- | --- | --- | --- | --- |
| 1. **My identity** | 1. **Other careers** | 1. **Finding SP** | 1. **SP is my purpose** | 1. **I fit SP** | 1. **My SP future** | 1. **My SP journey** | 1. **Advocacy for SP** | 1. **The future of SP** |
| #2 | 1. My identity (name, Y1 student, previous school, previous enrolment nursing) 2. Other careers (started studying nursing) 3. Finding SP (travel) 4. SP is my purpose (always interested, drawn to, realized my purpose, what I needed to do, knew my career would be like this, didn’t love nursing like this) 5. I fit SP (interests: helping people, speech, language, communication are most important, mind, human body, research) 6. My SP future (see myself working with children, developing a new treatment, educating parents, making a difference, rewarding job) | i | ii | iii | iv | v | vi | - | - | - |
| #15 | 1. My identity (name, Y1 student, age, birth place, grew up, previous school, straight to uni, knew what I wanted to do) 2. I fit SP (interests: passionate, enthusiastic about SP, interest in science, human bio, bio, psych) 3. Finding SP (attended SP with little sister; then did well at school, now considered medicine; then school trip to special needs school in Malaysia definitely SP) 4. SP is my purpose (working with special needs people, takes a special person, knew it was my purpose, worked to get grades) 5. I fit SP (personality traits: patience, talkative, confident) 6. My SP future (goals and aspirations, work in disability field, travel to needy countries, volunteer my services, cleft palate, spread awareness, make a change, AH workers create equal human rights) | i | - | iii | iv | ii v | vi | - | - | - |
| #22 | 1. My identity (name, other roles: mother, wife; Y1 student, cultural background, grew up, where lived as adult) 2. Other careers (previous training and career as accountant, not passionate) 3. Finding SP (didn’t know what I could do till I discovered SP) 4. SP is my purpose (want career with purpose, not accounting, to make a difference, help people achieve what not possible) 5. I fit SP (interests: daughter’s language development, others not so fortunate, help their sense of achievement, communication important) 6. Finding SP (looked into teaching, prefer 1:1) 7. I fit SP (personality traits: relating to individuals, being empathetic, building rapport) 8. Finding SP (considered OT, not right, found SP) 9. I fit SP (will enjoy, use my skills, what I want, helping others, excited to learn more) 10. My SP future (excited to learn more, make my mark) | i | iivi viii | iii | iv | v vii ix | x | - | - | - |
| #27 | 1. My identity (many aspects, other roles: mother, wife) 2. Other careers (enjoyed work as teacher, amazing experiences that have shaped me) 3. I fit SP (interests: language, literacy inspired to study again) 4. My SP future (help communication difficulties, achieve best QoL, enjoying learning, looking forward to future) | i | ii | - | - | iii | iv | - | - | - |
| #46 | 1. My identity (name, age) 2. Other careers (current job as EA) 3. Finding SP (told to do teaching, experience with ASD, learning signing, heard of SP/OT, researched) 4. SP is my purpose (something clicked, knew what I wanted to do) 5. My SP future (applied, got in, loving course, looking forward to future, my learning and growth) 6. I fit SP (personality traits: patience, understanding) | i | ii | iii | iv | vi | v | - | - | - |
| #55 | 1. I fit SP (interests: psych) 2. Other careers (previous work in people orientate roles) 3. Finding SP (travel) 4. Other careers (back to work, tragedy in life, chose psych) 5. Finding SP (SP units) 6. I fit SP (interest: psych behind language, co-neuro, voice, communication, want to know more) 7. My SP future (work with adults, kids, improve QoL) 8. SP is my purpose (help people, part of something purposeful, meaningful) 9. My SP future (work with adults ABI, empower to regain, with kids with stuttering, pre-ling skills) 10. I fit SP (interest: psych aspects of stuttering, hope to be effective, pragmatic, make positive changes) | - | ii iv | iii v | viii | i vix | viiix | - | - | - |
| #56 | 1. I fit SP (I have these SP qualities; desire to help people) 2. My SP future (want to work with children, prevent getting lost in system, family support, empower, give child confidence, skills, tool to excel, my wish) | - | - | - | - | i | ii | - | - | - |
| #66 | 1. My identity (name, age, born, Yi student, school last year) 2. I fit SP (help people, medical profession to improve QoL, psych interest) 3. My SP future (work with children with comm. diffs) 4. I fit SP (no experience but passion for learning, communication is important, improving is important) 5. My SP future (looking forward to learning, having a career) | i | - | - | - | ii iv | iii v | - | - | - |
| #72 | 1. My identity (name, many facets, roles: wife, mother; animal lover, passion for singing) 2. Other careers (previous education history and career journey as singer/singing teacher) 3. I fit SP (interest: voice, vocal problems, fixing issues) 4. Finding SP (personality/career tests) 5. I fit SP (want to help people, 1:1, focused on others not self as in singing, creative, explore new ideas, solve problems) 6. My SP future (use my attributes in my career, any area, adults/kids, voice eventually, want to be well-rounded) | i | ii | iv | - | iii, v | vi | - | - | - |
| #75 | 1. My identity (name, born, grew up, cultural background, current passions, gap year) 2. Other careers (dance teacher and travelled then retail) 3. I fit SP (fascinating, confident with decision) 4. My SP future (goal to specialise in children with disabilities, rewarding, improve QoL, give gift of communication and speech, independence, freedom) 5. I fit SP (love helping people, see growth, development, love working with children 6. Finding SP (told to teach, wanted beyond classroom/kids, SP perfect fit) 7. My SP future (on track to reach goal) | i | ii | vi | - | iii  v | iv  vii | - | - | - |

### Stages in Y4

| **Student** | **Stages summary** | 1. **My identity** | 1. **Other careers** | 1. **Finding SP** | 1. **SP is my purpose** | 1. **I fit SP** | 1. **My SP future** | 1. **My SP journey** | 1. **Advocacy for SP** | 1. **The future of SP** |
| --- | --- | --- | --- | --- | --- | --- | --- | --- | --- | --- |
| #6 | 1. Advocacy for SP (more than just words is the motto for my journey, SP is so much more, this is what is offers, demands, gives) 2. My SP journey (I’ve grown, been challenged, love SP, developed competency, been worth it, developed these traits and skills, used personally as well) 3. Advocacy for SP (I believe the right to communication,) 4. My SP future (I love SP because of what I can do now) | - | - | - | - | - | iv | ii | i iii | - |
| #7 | 1. My SP journey (my skills and knowledge are developing) 2. My SP future (undecided whether to work with kids or adults) 3. Advocacy for SP (SP is misunderstood/underestimated, this is all it does, I have seen the impact, communication, swallowing important, taken for granted) 4. My SP future (helping clients reach full potential, this is how I will do it) | - | - | - | - | - | ii iv | i | iii | - |
| #8 | 1. My SP journey (learnt so much in 5 years, didn’t know much at beginning) 2. Finding SP (was always interested, took too long so didn’t, then took son, knew I had to do it) 3. My SP journey (surprised by scope of practice and contexts, degree prepared me well, demands have been hard, bonus is peers, opportunities, bond from making it, it’s difficult, grateful for lecturers) 4. My SP future (I have the knowledge, confidence, skills, attributes, real learning now begins, excited to be ‘real SP’, proud, wanted to work with kids, now unsure enjoyed both, ready and inspired to improve client’s lives) | - | - | ii | - | - | iv | i iii | - | - |
| #41 | 1. My SP journey (passion for SP has grown, not just study, a job, to my future career, life, studying because it’s what I want to do with my life; this is what SP does and how – gives basic human rights, voice, QoL, enjoyable life) 2. Advocacy for SP (now seen how SP changes lives, gives voice) 3. My SP future (special profession, the SP I want to be, advocate, enable) | - | - | - | - | - | iii | i | ii | - |
| #99 | 1. My identity (name, Y4 student, my pracs to get to entry-level) 2. My SP journey (what I have developed, experienced, learnt, appreciate, 3. I fit SP (drama student, interest in health, SP perfect combo) 4. Advocacy for SP (I now know how imp communication is, how hard if you can’t how little the public know 5. My SP future (my philosophy is communicate, helped my confidence in advocating, I will help others, my drive to help others) | i | - | - | - | iii | v | ii | iv | - |
| #100 | 1. My identity (greeting with name, Y4 student, my prac) 2. My SP journey (the recent prac, supervisors, team environment) 3. I fit SP (relevant interests, help others, improve myself, hasn’t changed) 4. The future of SP (new developments are going to change things) 5. My SP future (my philosophy is what I do as a SP and how this helps, what I believe, what I’m looking forward to in next prac) | i | - | - | - | iii | v | ii | - | iv |
| #105 | 1. My identity (welcome to Y4 eP, what it is, I’m joining the SP profession) 2. My SP journey (grown over degree) 3. I fit SP (chose to work in health, make impact) 4. Advocacy for SP (communication is fundamental, a right 5. My SP future (I improve QoL) 6. My SP journey (my adult prac, how it developed me, loved, 7. My SP future (who I want to be, mixed in with prac, how it helped me, made my passionate, more to learn, feeling confidence as enter next prac) | i | - | - | - | iii | v vii | ii vi | iv | - |
| #108 | 1. My SP journey (welcome, this exciting year, dev skills, confident, variety of experience, enjoy it with me, path to SP) 2. Finding SP (began other courses, came upon SP, jumped in, here we are) 3. My SP future (my idea has changed, now being the very best, attributes, use resources, provide the best care) 4. Advocacy for SP (advocacy is essential, for clients, profession) 5. My SP journey (grateful for role models) 6. My SP future (never work a day, love what I do | - | - | ii | - | - | iii  vi | i v | iv | - |
| #110 | 1. My identity (name, Y4) 2. My SP future (setting of eP, final pracs, what is ahead in Y4, will learn, have the ability, have support, nervous, will get through) 3. My SP journey (didn’t know what SP was, gained knowledge, skills, changed me, can advocate, improve QoL) 4. My SP future (skills and values, advocate) 5. Advocacy for SP (role of SP is to advocate, make change in community) | i | - | - | - | - | ii iv | iii | v | - |
| #111 | 1. Advocacy for SP (this is what SP is) 2. My SP journey (steep learning curve, start of career journey, more equipped, have developed, my limitations, keep learning and applying, this is what I love re being a SP, what I’m good at, 3. My SP future (how I learn, what I will try to do, how I will support my peers, excited to begin in a team) | - | - | - | - | - | iii | ii | i | - |

# Scaffolding reflection for professional identity formation

## Who am I reflection scaffolding for Y1 and Y2

The question prompts are a guide to support your reflection, you do not have to answer all of them. You may also add other areas to your reflection. Maximum of one paragraph per stage. For Y2 read your Y1 page and consider how things have changed. Keep your Y1 page to read again in future years as you will forget how far you have come.

| **Stage** | **Definition** | **Question prompts** | **Examples** | **Language** |
| --- | --- | --- | --- | --- |
| My current personal identities | Who I am right now and the life that has shaped me.  I’m stating the facets of my identity that stand out to me right now and are relevant to the rest of my reflection. | Who are you right now?  How would you describe yourself?  What do you know about yourself?  What roles do you have in your life right now?  What is important to know about you that relates to the rest of your reflection? | Pick those that are most relevant for you:   - where you were born and grew up - your cultural background and other relevant personal characteristics - relevant life experiences (e.g., healthcare experiences, travel) - roles (e.g., coach, swimming teacher, mother, previous career) | Present and past tense  I am… I was… (relational processes) |
| Finding speech pathology as a career | What led me to speech pathology, how I found out about the career and decided to choose it. | How did you find out about SP?  Did you or a family member experience SP?  Was there a specific experience which triggered your search for or finding of SP? | You may have carried out research into health careers, seen a SP in action through family members or work, had general experiences with health staff which influenced your journey. | Past tense  I searched/found … (material processes)  I saw/heard/experienced/felt… (mental processes) |
| Other careers | I have looked at other careers, engaged in other work, had a previous career or started/completed a previous course but they didn’t suit me like I know SP will. Or they have shaped me but now it’s time for a change. | Were there other disciplines you considered or tried? Why did they not fit you?  What other careers or jobs have you had or tried and why will SP suit you better?  What does SP give that these careers don’t give you? | I started studying nursing/psychology but it wasn’t what I was looking for…  I am/was a swimming teacher and want to extend myself further…  I am/was an accountant or teacher but it was time for a change… | Past tense for self, present tense for SP  I was… (relational processes)  I did/studied/worked…  SP does/works… (material processes) |
| I fit SP | I fit the SP role and identity.  I am like SP in this way.  These are the attributes, values, traits that I have that fit SP. | Why is SP for you, what makes SP a meaningful choice or a good fit for you?  How do you know this is the right career for you? What motivates you to keep going?  How does SP fit with your passions, interests, beliefs, values, personality, previous experiences, skills, knowledge, and identity?  How are you aligning yourself to fit SP? | Describe your own personality traits, values and/or interests that you think are important for or linked with SP.  You can complete personality or values questionnaires to support your thinking.  How do these inform your world view you take into your role as a SP?  Describe any changes over this past year. | Present and past tense  Subjects are self, SP  I am…/A SP is… (relational processes)  I did…/A SP does… (material processes)  I/SPs like/love/enjoy/feel/think /believe … (thinking processes) |

| My SP journey | Over the past year of the program this is what I have learned and how I have changed. | How far have you come on your journey?  Has the program met your expectations?  How is becoming a SP part of your identity, your mission or calling in life?  How have your understanding of or feelings about SP changed so far?  What has happened or changed this year – what knowledge, skills and attributes have you developed? How are you being shaped or shaping yourself into a SP?  What were your challenges and how did you overcome them? How have you learned from them? How have you shown resilience?  What do you appreciate, looking back? What are you excited about looking forward? | Describe your feelings, senses, thoughts and experiences through the program this year. What has changed in your understanding of a SP’s roles, activities and contexts (scope of practice). | Past tense  I was… now I am… I have… (relational processes)  I’ve worked/studied/developed… now I can… (material processes)  I liked/didn’t like/loved/enjoyed/felt…  I appreciated…  I thought /believed/learnt…  I experienced/saw/heard…  (thinking processes) |
| --- | --- | --- | --- | --- |
| My SP future | I see myself in the role, I want to be/do this.  I will get there by these goals. | Who do you want to be as a SP? Who do you see yourself working with? Where are you working? What are you doing?  Why is this important to you?  Why is this important to clients?  Do you have the knowledge, confidence, skills, attributes you require?  How will you achieve them? What can you do to make this vision a reality? How can you explore other options for your future?  How do you see the next year of the course? What will you feel, sense, think?  What is your goal for the next steps in your journey? Your aspirations? Your values? | Create a clear vision or rich picture of yourself in your future career. This is the SP role that you see yourself inhabiting and the difference you will be making for and with clients. Use SP terminology you have learned so far.  Make a plan for the next steps in your journey, what you need to learn, the skills you need to have and what you will try to do to get there. | Future tense  Be definite  Subjects are clients, self and SPs  SP terminology  I will work as/help… (material processes)  I know/believe I will…  I’m looking forward …  I see myself as… (mental processes) |

## Who am I reflection scaffolding for Y3 and Y4

Read your previous pages and consider how things have changed. Keep your previous pages to read again in future years. The question prompts are a guide to support your reflection, you do not have to answer all of them. You may also add other areas to your reflection. Maximum of one paragraph per stage.

| **Stage** | **Definition** | **Question prompts** | **Examples** | **Language** |
| --- | --- | --- | --- | --- |
| My current personal identities | Who I am right now and the life that has shaped me.  I’m stating the facets of my identity that stand out to me right now and are relevant to the rest of my reflection and my future career. | Who are you right now?  How would you describe yourself?  What do you know about yourself?  What roles do you have in your life right now?  What is important to know about you that relates to the rest of your reflection? | Pick those that are most relevant for you:   - your cultural background - other relevant personal characteristics - relevant life experiences roles (e.g., coach, swimming teacher, mother, previous career) | Present and past tense  I am… I was… (relational processes) |
| I fit SP | I fit the SP role and identity.  I am like SP in this way.  These are the attributes, values, traits that I have that fit SP. | Why is SP for you, what makes SP a meaningful choice or a good fit for you?  How do you know this is the right career for you? What motivates you to keep going?  How does SP fit with your passions, interests, beliefs, values, personality, previous experiences, skills, knowledge, and identity?  How are you aligning yourself to fit SP?  How is your sense of belonging to the profession increasing? | Describe your own personality traits, values and/or interests that you think are important for or linked with SP.  You can complete personality or values questionnaires to support your thinking.  How do these inform your world view you take into your role as a SP?  Describe any changes over this past year. | Present and past tense  Subjects are self, SP  I am…/A SP is… (relational processes)  I did…/A SP does… (material processes)  I/SPs like/love/enjoy/feel/think /believe … (thinking processes) |
| My SP journey | Over the past year of the program this is what I have learned and how I have changed. | How far have you come on your journey?  Has the program met your expectations?  How is becoming a SP part of your identity, your mission or calling in life?  How have your understanding of or feelings about SP changed so far?  What has happened or changed this year – what knowledge, skills and attributes have you developed? How are you being shaped or shaping yourself into a SP?  What were your challenges and how did you overcome them? How have you learned from them? How have you shown resilience?  What do you appreciate, looking back? What are you excited about looking forward? | Describe your feelings, senses, thoughts and experiences through the program this year. What has changed in your understanding of a SP’s roles, activities and contexts (scope of practice). | Past tense  I was… now I am… I have… (relational processes)  I’ve worked/studied/  developed… now I can… (material processes)  I liked/didn’t like/loved/  enjoyed/felt…  I appreciated…  I thought /believed/learnt…  I experienced/saw/heard…  (thinking processes) |

| Other members of the team | What I have learned about other disciplines and how we complement each other and work together to achieve client outcomes | What have you learned about other disciplines this year? Have you changed any stereotypes about other disciplines?  What have you learned about collaboration and understanding different perspectives and thinking styles to achieve client outcomes?  How are you learning from other disciplines? | I saw a scope of a role I hadn’t seen before in a discipline.  I learnt a different perspective on how to meet a client’s goals.  I developed interprofessional skills. | Past tense  I worked with/helped/developed relationships with (material processes)  I thought /believed/learnt…  I experienced/saw/heard…  (thinking processes) |
| --- | --- | --- | --- | --- |
| Advocacy for SP | This is how I understand the profession and how valuable it is now, how little understood, how important to advocate | Why is SP important?  How will you communicate this and to whom?  What does SP expect or demand from you?  What does it offer you? | You may describe the key value of SP in the healthcare team, the importance of communication, how you will advocate for yourself, your discipline and your clients in the future. | Past, present or future tense.  Subjects are clients, self and SPs  SP is (relational processes)  I will advocate/explain/tell… (verbal processes)  I’m committed/obligated/ determined (thinking processes) |
| My SP future | I see myself in the role, I want to be/do this.  I will get there by these goals. | Who do you want to be as a SP? Who do you see yourself working with? Where are you working? What are you doing?  Why is this important to you?  Why is this important to clients?  Do you have the knowledge, confidence, skills, attributes you require?  How will you achieve them? What can you do to make this vision a reality? How can you explore other options for your future?  How do you see the next year of the course/working life? What will you feel, sense, think?  What is your goal for the next steps in your journey? Your aspirations? Your values? | Create a clear vision or rich picture of yourself in your future career. This is the SP role that you see yourself inhabiting and the difference you will be making for clients.  Make a plan for the next steps in your journey, what you need to learn, the skills you need to have and what you will try to do to get there. | Future tense  Be definite  Subjects are clients, self and SPs  SP terminology  I will work as/help… (material processes)  I know/believe I will…  I’m looking forward …  I see myself as… (mental processes) |
| The future of SP (optional) | This is how I see the profession is going to change in the future | Where do you see the profession going in the next 10 years?  How will you fit with that vision?  How do you see your career progressing? | You may describe future research or technologies that will change practice. You may describe how your see your career over the next ten years. | Future tense  Subjects are clients, self and SPs  SP/I will become/change…  I think/hope/see… (mental processes) |
